# Supplementary material for: CancerDiscover: an integrative pipeline for cancer biomarker and cancer class prediction from high-throughput sequencing data
Source: PubMed Central journal article supplement (PMC5788660; doi:10.18632/oncotarget.23511), 2017-12-20
Supplement: oncotarget-09-2565-s001.pdf [file oncotarget-09-2565-s001.pdf]

# **CancerDiscover: an integrative pipeline for cancer biomarker and cancer class prediction from high-throughput sequencing data**

## **SUPPLEMENTARY MATERIALS**

**Supplementary File 1: CancerDiscover User Manual for detailed installation/operation instructions**

See Supplementary File 1

**Supplementary File 2: List of the available feature selection methods**

See Supplementary File 2

**Supplementary File 3: Comparisons of CancerDiscover with other tools**

| Model              | CancerDiscover | GenePattern | Chipster | Aliferis |
|--------------------|----------------|-------------|----------|----------|
| Tumor vs. normal   | 99.21          | 98.43*      | 97.63*   | 94.97*   |
| Adeno vs. squamous | 99.06          | 99.06*      | 98.82*   | 96.83*   |

The accuracies of CancerDiscover, GenePattern, Chipster, and Aliferis.

\*Due to the unavailability of analysis components, CancerDiscover components were used.
